# Supplementary material
Source: Springer Nature journal article supplement (https://www.springermedizin.de/resource/supplementary/12879_2009_1042_MOESM3_ESM.pdf/9442452)

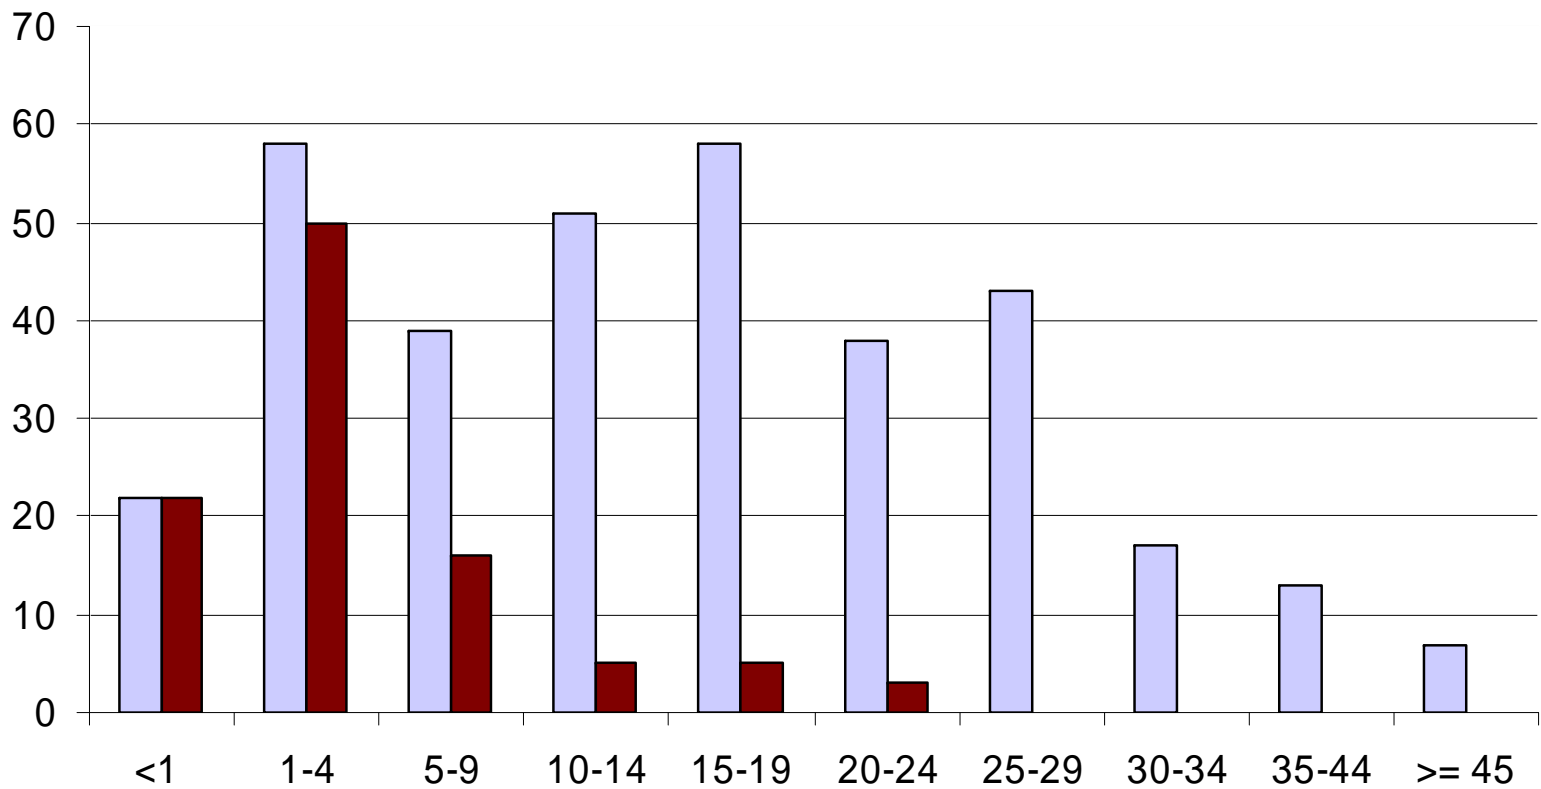

■ Italian ethnic population ■ Roma/Sinti

Supplement: MOESM3 [file 9442452]
